# Supplementary material for: Dynamically Downscaled Future Projections of the Northwest Atlantic Ocean Across Low to High Emissions Scenarios
Source: Copernicus journal article supplement (doi:10.5194/egusphere-2025-6449), 2026-01-06
Supplement: Supplementary file [file egusphere-2025-6449-AC1-supplement.pdf]

This manuscript analyses results from a high-resolution ( $1/12^\circ$ ) regional ocean model of the NW Atlantic forced by fluxes and boundary conditions from a lower resolution fully-coupled earth system model. Specifically, four CMIP scenarios for different future warming levels are integrated out to 2100, and the work focuses on changes to currents, surface temperature, salinity, and sea-surface height (SSH). While others have already studied the resulting future reduction to the current systems (Atlantic Meridional Overturning Circulation (AMOC) and Western Boundary Current (WBC)) for the highest warming scenario (RCP8.5 and SSP585) in fully-coupled climate models (for CMIP5,  $\sim 1^\circ$  ocean models, Beadling et al., 2018; for CMIP6,  $\sim 1/4 - 1/12^\circ$  ocean models, Roberts et al., 2020), the present investigation focuses on changes in the societally important near-coastal and shelf regions (Gulf of Mexico/America, West of Florida, South Atlantic Bight, Mid Atlantic Bight and Gulf of Maine), and investigates the range of possible conditions for the four different warming scenarios. These regions are found to become warmer and saltier in the future (changes which could affect the marine ecosystems) and also to have higher sea-levels. This near-coastal/ shelf focus examined across multiple future warming scenarios has not been studied before to my knowledge, and could provide useful information about future conditions for marine planners and societal uses.

However, there are two main drawbacks to the work which should be addressed before publication could be considered, as follows:

We appreciate the reviewer for their careful review of our manuscript and insightful and constructive comments. As suggested, we add a discussion regarding the potential role of the Labrador Slope Water (LSLW) in changing the ocean conditions along the Mid-Atlantic Bight (MAB). Here, we provide point-by-point responses to address each of the reviewer's comments and suggestions. Our replies are provided below in blue font for each of the general and specific comments. We believe that the revised manuscript is much improved.

**Northern Inputs.** The manuscript proposes (e.g. Is 41-42, 499-503) several mechanisms which may cause the changes (warming and salinification) of the coastal and shelf waters along the US South and East coasts, such as the reduced upwelling of colder and fresher waters due to the reduced flows in the Loop Current and Gulf Stream (affecting the Gulf of America/Mexico), and a northward and shoreward shift of the Gulf Stream following its separation (affecting the Mid Atlantic Bight (MAB) and Gulf of Maine (GOM)). However, it should also acknowledge the possibility of changes in the current systems which bring waters to the MAB/GOM shelf and slope region. The coastal/shelf waters here are largely derived from the inshore Labrador Current which exits the Hudson Strait, passes over the Grand Banks and then forms the Nova Scotia Current to provide cold, fresh waters to this area. In addition the (offshore) Labrador Current (with origins in the Davis Strait and West Greenland Current) flows around the Tail of the Grand Banks, and after mixing with North Atlantic Central Water, forms Labrador Slope Water which flows southwards along the shelf slopes as far as Cape Hatteras, with a core at depths of 400-600m (see New et al., 2021, and the references therein). The manuscript should acknowledge the possibility of changes in the temperature and salinity of these northern inputs as a cause of the warming and salinification here: the changes in the coastal/shelf waters imply changes in the inshore LC, and in particular the warming and salinification observed on the shelf slopes in the MAB (figure 14) at 400-600m are strongly indicative of changes the in LSLW. This possibility is briefly acknowledged in Is. 333-334 but without any evidence: more discussion of this mechanism is needed either here or, better, in the discussion section: e.g. which of the various mechanisms is actually responsible for the changes in

the MAB and GOM? Also, inclusion of a figure showing changes in the near-surface properties of the Labrador Sea (which provide the head waters for the MAB and GOM areas) would be very useful.

As the reviewer pointed out, the Mid-Atlantic Bight (MAB) and the Gulf of Maine are strongly influenced by the Labrador Current and the Labrador Slope Water (LSLW). To investigate the future changes in LSLW and the associated Slope Current, we plot the vertical cross-section of the alongshore current across 30°N–41°N, 76°W–67°W in the MAB (Fig. R1). It is clear that the Slope Current is not well reproduced in MOM6-NWA12 during the historical period (1993–2020). It is much weaker compared to that in GLORYS12, and is replaced by northward flow in the upper 400m or so. Another core of southward flow appears immediately shoreward of the Gulf Stream in MOM6-NWA12. Since it is positioned away from the slope (near 73°W), it is referred to as the northern recirculation flow of the Gulf Stream.

In the future projections, the Gulf Stream weakens and its core shifts shoreward. In the SSP370 and SSP585 scenarios, the Gulf Stream core is positioned along the continental slope. Thus, both the northern recirculation flow and the Slope Current (below 600m or so) disappear in those two scenarios. Therefore, despite a large bias in the location and strength of the Slope Current in MOM6-NWS12, we can still conclude that the future warming and salting along the MAB shown in Fig. 17 are the result of a compounding effect - reduced advection of cold, fresh Labrador Sea waters combined with the weakening and shoreward shift of the Gulf Stream.

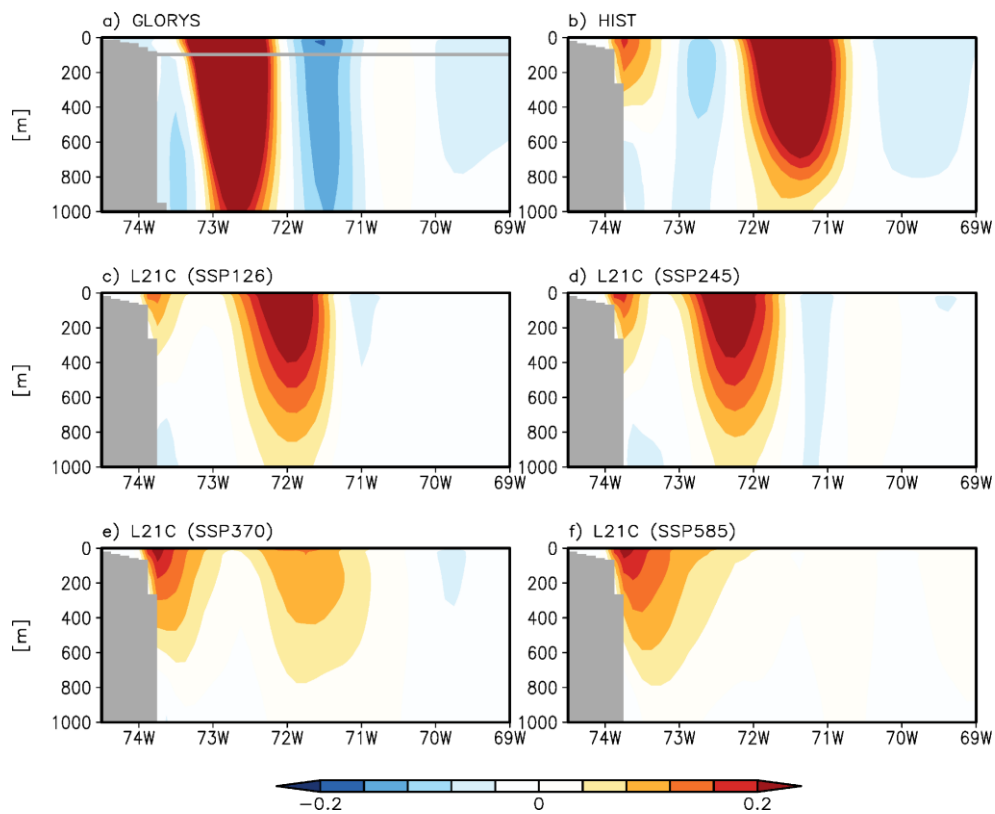

Fig. R1. (a) Vertical cross-section of the mean alongshore current across the MAB (30°N–41°N, 76°W–67°W) during the historical period (1993–2020) from GLORYS12. (b) Same as (a), but for MOM6-NWA12.

(c)-(f) Same as (b), but for the future period (2073-2100) from the (c) SSP1-2.6, (d) SSP2-4.5, (e) SSP3-7.0, and (f) SSP5-8.5 simulations, respectively.

Figure R1 is now added in the revised supplementary material. We also add the following discussion in the revised manuscript.

(L580-595) In addition, as discussed in New et al. (2021), the MAB and the Gulf of Maine are also strongly influenced by the Labrador Current and the Labrador Slope Water (LSLW). The Slope Current in MOM6-NWA12 shows a large bias in its position and the strength. More specifically, it is much weaker compared to that in GLORYS12, and is replaced by northward flow in the upper 400m or so (Supplementary Fig. 6). Another core of southward flow appears immediately shoreward of the Gulf Stream in MOM6-NWA12. Since it is positioned away from the continental slope (near 73°W), it is referred to as the northern recirculation flow of the Gulf Stream. In the future scenarios, both the northern recirculation flow and the Slope Current (below 600m) drastically weaken. The Gulf Stream also weakens and its core shifts shoreward. In the SSP370 and SSP585 scenarios, the Gulf Stream core is positioned along the continental slope. Thus, both the northern recirculation flow and the Slope Current (below 600m or so) completely disappear in those high emission scenarios. Therefore, despite a large bias in the location and strength of the Slope Current in MOM6-NWA12, we can still conclude that the future warming and salting in the MAB, shown in Fig. 17, are the result of a compounding effect - a weakening and shoreward shift of the Gulf Stream combined with reduced advection of cold, fresh Labrador Sea waters.

**Sea-surface height.** While the results for the coastal/shelf Sea-Surface Temperature (SST) and Salinity (SSS) are interesting, the results for Sea-Surface Height (SSH) are of limited value because they only consider changes to “dynamic height” i.e. changes caused by changes in the currents (as the model has the Boussinesq approximation and cannot accommodate changes in the SSH due to warming of the water column). As the currents reduce, so does the SSH gradient across them (as expected since the SSH gradients relate to the surface geostrophic flow) meaning that the SSH to the north of the currents (on the shelf regions) generally increases and that to the southward/ oceanward side of the currents decreases. Steric sea-level changes due to the warming (and salinity change) of the water column need to be more fully discussed rather than the brief statement (ls. 473-478) about general future increases: e.g. we would need to know about the spatial structure (presumably not constant everywhere) of these changes which add to the dynamic changes presented, so that a full picture of future SSH can be formed. Perhaps a description of such spatial variability could be included based on the references in ls. 477-478. Furthermore, this lack of steric sea-level change seems to be related to their statement in ls. 222-223 that the basin-averaged SSH anomalies in the NWA12 model do not vary in time, but this should be explained more clearly.

We agree that providing a "full picture" of future coastal sea-level rise requires discussing the global mean sea level rise associated with ocean warming and glacial and ice-sheet melting along with the regional circulation-driven (i.e., dynamic) sea-level changes.. To discuss “full-picture” of coastal sea-level rise, we discuss in more detail the global mean sea level rise projection from the IPCC AR6 report in the revised manuscript.

(L530-542) Finally, we emphasize that the dynamical SSH changes described in this study would occur in addition to the global mean sea level (GMSL) rise associated with ocean warming and glacial and ice-sheet melt. As described in the methods, MOM6-NWA12 can respond to local density changes driven by local warming and freshening (e.g., Steinberg et al., 2024), GMSL rise is not directly reflected in the model simulation due to the Boussinesq approximation. Therefore, to explore the total coastal SSH change (i.e., dynamic SSH changes plus GMSL rise) in the late 21st century, the dynamic SSH changes derived from MOM6-NWA12 are combined with the GMSL change. According to the IPCC AR6 report (IPCC, 2021), the projected GMSL rise by the late 21st century relative to the historical period is 0.38 m for SSP-126, 0.47 m for SSP-245, 0.56 m for SSP-370, and 0.64 m for SSP-585, respectively. Specifically, in the SAB under the SSP-585 scenario, the dynamic sea level increase by the late 21st century (~0.2 m) accounts for nearly 25% of the total sea level increase. This highlights that the SAB could experience extreme and compounding (e.g., high tides and storm surges) coastal flooding risks in the future.

We also clarify the lack of GMSL changes in both MOM6-NWA12 and GFDL-ESM4.1 in the method section of the revised manuscript.

(L232-242) Finally, for sea level, we note that both GFDL-ESM4.1 and MOM6-NWA12 utilize the Boussinesq approximation, which conserves ocean volume. The dynamic sea level in both models can respond to local density changes driven by local warming and freshening (e.g., Steinberg et al., 2024). However, these models cannot simulate global mean sea-level (GMSL) rise caused by thermosteric expansion or added mass from ice melt (e.g., Greatbatch, 1994; Griffies and Greatbatch, 2012; Griffies et al., 2014). Furthermore, to prevent potential drifts in the basin-integrated water volume associated with the lateral open boundary conditions, we explicitly constrain the basin-averaged SSH anomaly to be zero throughout all MOM6-NWA12 simulations. Consequently, the SSH changes derived from MOM6-NWA12 strictly represent the dynamic redistribution of water mass driven by regional ocean circulation and local steric adjustments.

### **Minor Points**

I. 148. What forcing does the ESM model provide to the NWA12 model: just air-sea fluxes or lateral boundary conditions (BCs) as well? And how are the lateral BCs passed across given that the ESM uses hybrid ALE layers and the NWA uses the  $z^*$  coordinate (so some interpolation should be required)?

In this study, MOM6-NWA12 uses both atmospheric fluxes and lateral boundary conditions from GFDL-ESM4 after a bias correction. ESM4 ocean model data were interpolated online from the native hybrid vertical coordinate to a  $z$ -level coordinate before being written out, and this  $z$ -level model output was then remapped online onto the  $z^*$  coordinate of MOM6-NWA12 during the boundary condition updates.

To avoid any confusion, we modified the sentence describing the GFDL-ESM4 vertical coordinate in the revised manuscript (L158).

I. 157. What is the resolution of the ocean model (the atmosphere model is  $1^\circ$ )

GFDL-ESM4 has a nominal resolution of  $\frac{1}{2}$  horizontally (Dunne et al., 2020). We added the information of GFDL-ESM4 ocean model (MOM6) horizontal resolution in the revised manuscript (L158).

l. 179: this is section 2.4 not 2.5

Thank you. Fixed it.

Fig. 2 caption: l. 918 insert (b) and (c) for the SSS and current speed panels.

We added them in the Fig.2 caption. Thank you.

Fig. 5 caption. l.s 954-955: (a) is for Yucatan, (b) for the Florida Current: the caption has these the wrong way around.

Thank you. Fixed them.

l. 325: “scenarios” not “scenario” better.

Changed.

l.s 335-337: insert latitudes and longitudes of the centres of the regions of minimum surface warming to make things clearer.

We added the longitude/latitude information of minimum surface warming.

l.s 338-340: could the region of minimum SST increase South of Gulf Stream in fig 6e be due to the reduced GS strength (fig 7j, i.e. bringing less heat transport) as well as to its northward shift?

Under high emission scenarios (i.e., SSP370 and SSP585), the Worthington Gyre (Worthington, 1976)—a recirculation gyre located south of the Gulf Stream near 35°N, 73°W—almost completely disappears due to the weakening of the Gulf Stream (Figs. 9d and 9e), leading to a reduction in heat convergence to the region. Therefore, as the reviewer indicates, the weakened Gulf Stream is the primary driver of the minimal future SST increase observed south of the Gulf Stream, where the Worthington Gyre was located during the historical period.

We changed this in the revised manuscript.

(L363-364) “These regions of minimal SST warming appear to be linked to the reduced Gulf Stream or the reduced Loop Current, implying a reduction in ocean heat convergence to these regions (Figs. 6e and 6j).”

l.s 359-360: could refer to Beadling et al. 2018 and Roberts et al. 2019 here in connection with reductions in the WBC system.

We added the references.

l. 1001: fig 8 caption: remove “The vertical dotted lines” at the end.

The end of the sentence is missing. Thank you for pointing it out. We changed the Figure 9 caption (originally Figure 8). “The vertical dotted lines indicate the historical and future averaging periods.”

l. 383 etc. There are several references to the slowdown of the AMOC but a figure of this only appears in the Supplementary material. Please insert this figure (S6) in the main manuscript somewhere near here. This is important because the AMOC is NOT the same as the WBC system, e.g. McCarthy et al., 2015. This also means that in l. 426, refer to the new AMOC figure rather than to figure S6.

We added McCarthy et al. (2015) as a reference and moved former Figure S6 from the supplement to the main manuscript as Figure 10.

Fig 10 caption: say the years are e.g. model years - 2000.

To avoid confusion, we changed figure 13 (originally Figure 10) caption and added description.

“**Fig. 13.** Spatially averaged sea level changes (cm) from historical period (1993-2020) in (a) the northern Gulf of America, (b) West Florida shelf, (c) the South Atlantic Bight, (d) the Middle Atlantic Bight, and (e) the Gulf of Maine under the SSP-126 (blue bars), SSP-245 (green bars), SSP-370 (orange bars) and SSP-585 (red bars) simulations. The dynamic sea level changes are spatially averaged over the shelf regions below 200 m depth (brown-colored area in the maps). The years on the x-axis represent the center of a 20-year averaging period (e.g., the value for 2030 represents the average from 2021 to 2040). “

l. 423: after “begins to emerge” insert “after 2070”.

We added it.

Fig. 12: it would be good to include density changes here as well as the dynamically important quantity: lighter water on the western side of the channel would be consistent with lower (geostrophic) flows through the Florida Straits.

Fig. R2 shows the vertical cross-section of mean density in the east coast of Florida (26.5°N, 79.7°W–78.0°W) during the historical period and its future changes under four SSP scenarios. During the historical period, the isopycnals strongly tilt upward toward the Florida coast (Fig. R2a), supporting a strong northward geostrophic flow. However, the future projections show a pronounced negative density anomaly (i.e., lighter water) emerging precisely around 200 m depth along the coast (Fig. R2b-e). This localized density reduction results in a flattening of the isopycnals, indicating an increasingly stable water column along the coast. Consequently, this flattening of the isopycnals weakens the cross-stream horizontal density gradient, thereby reducing northward volume transport in the Florida Straits.

We added the Fig. R2 in the supplementary and discussed it in the revised manuscript.

(L493-497) “A distinct decrease in density (i.e., lighter water) emerges on the western side of the Florida Current around 200 m depth (Supplementary Fig. S5). This localized density reduction reflects a relaxation, or flattening, of the upward-tilted isopycnals along the Florida coast. Consequently, this flattening of the isopycnals weakens the cross-stream horizontal density gradient, thereby reducing northward volume transport in the Florida Straits.”

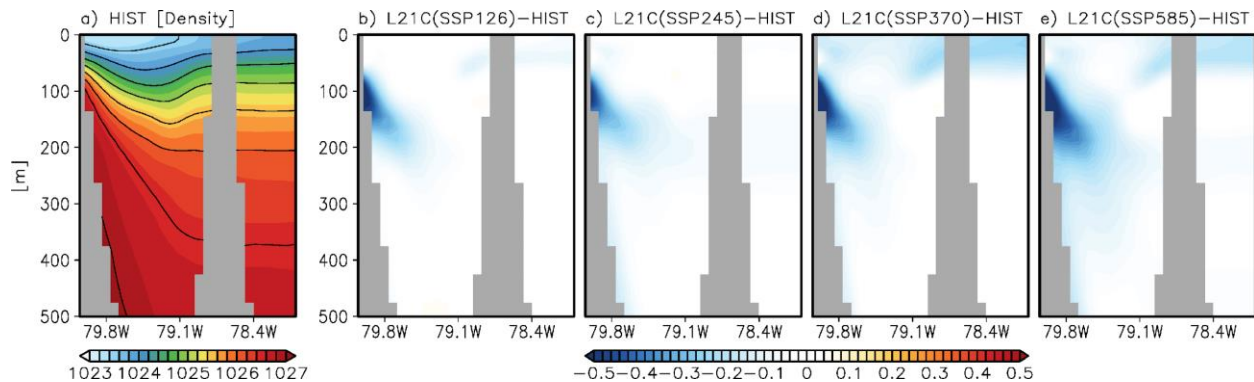

Fig. R2. (a) The vertical cross-sections of the mean density in the east coast of Florida (26.5 °N, 79.7°W-78.0°W) during the historical period (1993-2020). The difference in density between the future and historical periods from (b) SSP-126, (c) SSP-245, (d) SSP-370, and (e) SSP-585 simulations, respectively.

l.s. 514-516: “Further analysis indicates that the weakening of the Florida Current accompanies a substantial reduction of upwelling of cold and fresh subsurface water to the continental slope and shelf region.” – where is this further analysis??

This refers to Figure 15 (originally Fig. 12), which shows the vertical cross-section of ocean conditions off the east coast of Florida. For clarity, we have revised the sentence in the manuscript.

(L580-582) “Further analysis, shown in Fig. 15, indicates that the weakening of the Florida Current accompanies a substantial reduction of upwelling of cold and fresh subsurface water to the continental slope and shelf region.”

## References

Beadling, R. L., Russell, J. L., Stouffer, R. J. & Goodman, P. J. Evaluation of subtropical North Atlantic Ocean circulation in CMIP5 models against the observational array at 26.5°N and its changes under continued warming. *J. Clim.* 31, 9697-9718, <https://doi.org/10.1175/jcli-d-17-0845.1> (2018).

McCarthy, G. D., et al. Measuring the Atlantic Meridional Overturning Circulation at 26°N. *Prog. Oceanogr.* 130, 91-111, <http://dx.doi.org/10.1016/j.pocean.2014.10.006> (2015).

New, A. L. et al. Labrador Slope Water connects the subarctic with the Gulf Stream. *Environ. Res. Lett.* 16, 084019, <https://doi.org/10.1088/1748-9326/ac1293> (2021).

Roberts, M. J. et al. Sensitivity of the Atlantic Meridional Overturning Circulation to model resolution in CMIP6 HighResMIP simulations and implications for future changes. *J. Adv. Model. Earth Sy.* 12, e2019MS002014, <https://doi.org/10.1029/2019MS002014> (2020).

Intergovernmental Panel On Climate Change (Ipc). *Climate Change 2021 – The Physical Science Basis: Working Group I Contribution to the Sixth Assessment Report of the Intergovernmental Panel on Climate Change.* (Cambridge University Press, 2023). doi:10.1017/9781009157896.

Dunne, J. P., Horowitz, L. W., Adcroft, A. J., Ginoux, P., Held, I. M., John, J. G., Krasting, J. P., Malyshev, S., Naik, V., Paulot, F., Shevliakova, E., Stock, C. A., Zadeh, N., Balaji, V., Blanton, C., Dunne, K. A., Dupuis, C., Durachta, J., Dussin, R., Gauthier, P. P. G., Griffies, S. M., Guo, H., Hallberg, R. W., Harrison, M., He, J., Hurlin, W., McHugh, C., Menzel, R., Milly, P. C. D., Nikonov, S., Paynter, D. J., Ploshay, J., Radhakrishnan, A., Rand, K., Reichl, B. G., Robinson, T., Schwarzkopf, D. M., Sentman, L. T., Underwood, S., Vahlenkamp, H., and Winton, M.: The GFDL Earth System Model Version 4.1 (GFDL-ESM 4.1): Overall coupled model description and simulation characteristic, *Journal of Advances in Modeling Earth Systems*, 12, e2019MS002015. <https://doi.org/10.1029/2019MS002015>, 2020.

Ross, A. C., Stock, C. A., Koul, V., Delworth, T. L., Lu, F., Wittenberg, A., and Alexander, M. A.: Dynamically downscaled seasonal ocean forecasts for North American east coast ecosystems, *Ocean Science*, 20, 1631–1656, <https://doi.org/10.5194/os-20-1631-2024>, 2024.
